# Supplementary material for: Transactivation of miR-202-5p by Steroidogenic Factor 1 (SF1) Induces Apoptosis in Goat Granulosa Cells by Targeting TGFβR2
Source: PubMed Central journal article supplement (PMC7072820; doi:10.3390/cells9020445), 2020-02-14
Supplement: cells-09-00445-s001.pdf [file cells-09-00445-s001.pdf]

Supplementary Files

Article

# Transactivation of miR-202-5p by Steroidogenic Factor 1 (SF1) Induces Apoptosis in Goat Granulosa Cells by Targeting TGF $\beta$ R2

Qiang Ding <sup>†</sup>, Miaohan Jin <sup>†</sup>, Yaoyue Wang, Jiao Liu, Peter Kalds, Ying Wang, Yuxin Yang, Xiaolong Wang <sup>\*</sup> and Yulin Chen <sup>\*</sup>

Key Laboratory of Animal Genetics, Breeding and Reproduction of Shaanxi Province, College of Animal Science and Technology, Northwest A&F University, Yangling 712100, Shaanxi, China;  
dingqiang@nwafu.edu.cn (Q.D.); jinmiaohan@nwafu.edu.cn (M.J.); 18792629437@163.com (Y.W.);  
liujiaodk@163.com (J.L.); peterkalds@nwafu.edu.cn (P.K.); nd2013wang@163.com (Y.W.);  
yangyuxin2002@126.com (Y.Y.)

<sup>†</sup> These authors equally contribute to this paper

<sup>\*</sup> Correspondence: xiaolongwang@nwafu.edu.cn (X.W.); chenyulin@nwafu.edu.cn (Y.C.)

## Supplementary Tables

**Table S1.** the primers are used in this study.

| Primers                                               | Sequences (5'-3')                                                                                      |
|-------------------------------------------------------|--------------------------------------------------------------------------------------------------------|
| CYP19A1 promoter R                                    | TCCTCGAGTGGAGATCAGAAGAGTGGAA                                                                           |
| No SF1 binding site (-40 nt to -211nt)                | CTGCTAGCTCTTGGGCTTGCTTGTTT                                                                             |
| 0.5 kb promoter CYP19A1 (-40 nt to -522 nt)           | TAGCTAGCTGACTGGAGAAGCCTACC                                                                             |
| 1.6 kb promoter CYP19A1 (-40 nt to -1640 nt)          | CGGCTAGCGTGGTGACAGATAACAACCTAG                                                                         |
| CYP19A1 Promoter SF1 binding site mut F               | ACTCTACACCGTACCGAAATGCTGCACTTCAAGCCAAAAG                                                               |
| CYP19A1 promoter SF1 binding site mut R               | ATTTCCGGTACGGTGTAGAGTCTCAGGTTTCGTTTAGACGCTTG                                                           |
| miR-202 WT promoter R                                 | CCAAGCTTCTTACCTGGTCGCAGTCA                                                                             |
| miR-202 WT 0.5 K promoter F (-130 nt to -515 nt)      | GAAGATCTGAGATGCCGTTCTGAAG                                                                              |
| miR-202 NO binding site promoter F (-130nt to -257nt) | GAAGATCTGCCTGGCATAAAAAGGCGCCA                                                                          |
| miR-202 promoter SF1 binding site mut F               | CCGCGATTGAATCTGCCTGGCATAAAAAGGCGCCAGGCGGTC                                                             |
| miR-202 promoter SF1 binding site mut R               | AGGCAGATTCAATCGCGGGGCGGCCGTCACGTGCGGTCAC                                                               |
| TGFβ2 F                                               | TCAGCCGAATAGGTAGGAA                                                                                    |
| TGFβ2 R                                               | AGAGGTCAATGAGCAACAG                                                                                    |
| TGFβ1 F                                               | TCCACGAGACAGGCCATTTG                                                                                   |
| TGFβ1 R                                               | GACGGCTTTCCTGTAAAAGGG                                                                                  |
| GAPDH F                                               | ACACCCTCAAGATTGTCAGC                                                                                   |
| GAPDH R                                               | ATAAGTCCCTCCACGATGC                                                                                    |
| BAX F                                                 | CTGAGCGAGTGTCTGAAG                                                                                     |
| BAX R                                                 | TCGAAGGAAGTCCAATGTC                                                                                    |
| Bcl2 F                                                | TTCTTTGAGTTCGGAGGGG                                                                                    |
| Bcl2 R                                                | CCAGGAGAAATCAAACAGGGGG                                                                                 |
| PCNA F                                                | ACTCGTCTCATGTCTCCTT                                                                                    |
| PCNA R                                                | GGTGTCCGATTATCTTCA                                                                                     |
| Notch2 F                                              | TGGAGATGAAGAACAGGAAG                                                                                   |
| Notch2 R                                              | AACAGCAAGCAGATAGAGAA                                                                                   |
| Chi-miR-202-5p for cDNA reverse                       | GTCGTATCCAGTGCAGGGTCCGAGGTATTCGCACTGGATACGACA<br>AAGAA                                                 |
| Chi-miR-202-5p for qPCR UR R                          | GCGGGCTTCCTATGCATATACT<br>CAGTGCAGGGTCCGAGGT<br>GTCGTATCCAGTGCAGGGTCCGAGGTATTCGCACTGGATACGACC<br>AAGCT |
| Cel-miRNA-39 R                                        | TCACCGGGTGTAATCAGCT                                                                                    |
| Cel-miRNA-39 F                                        | CTCGCTTCGGCAGCAC                                                                                       |
| U6 F                                                  | AACGCTTCACGAATTTGCGT                                                                                   |
| U6 R                                                  | CCCTCGAGACTCCAAGAAGTTGTTGTCA                                                                           |
| TGFβ2 3'UTR WT F                                      | TTTGCGGGCCGCTCCACCTGAACCGAGAAG                                                                         |
| TGFβ2 3'UTR WT R                                      | TAATCCTCGAGATGGAACCTGGTAATCCACAAACA                                                                    |
| TGFβ2 3'UTR Wut F                                     | TCCATCTCGAGGATTAAAGCTCATTCTTGGTT                                                                       |
| TGFβ2 3'UTR Wut R                                     | CCAAGCTTATGGACTATTTCGTACGACGA                                                                          |
| SF1 CDS F                                             | CGGGATCCAGTCTGCTTGGCCTGCAGCA                                                                           |
| SF1 CDS R                                             | CCAAGCTTATGGGCCCCGGGGCTGCTC                                                                            |
| TGFβ2 CDS F                                           | CGGGATCCCTATTTGGTAGTGTGAGGG                                                                            |
| TGFβ2 CDS R                                           | GAGAACTCAGTCACTCTACC                                                                                   |
| ChIP CYP19A1 F                                        |                                                                                                        |

ChIP CYP19A1 R  
 ChIP miR-202 F  
 ChIP miR-202 R

TGGACACTTAGACAAGACAA  
 CTCAGAGCAGGTCTTTGTG  
 CTTACCTGGTCGCAGTCA

**Table S2.** the sequences of siRNA are used in this study.

| siRNA                    | sense (5'-3')         | antisense (5'-3')     |
|--------------------------|-----------------------|-----------------------|
| TGFBR2-goat-984          | GCAAUGACCACAUCAUCUUTT | AAGAUGAUGUGGUCAUUGCTT |
| TGFBR2-goat-1843         | CCUCGAGUCCAGGAUGAAUTT | AUUCAUCCUGGACUCGAGGTT |
| NR5A1-goat-311           | GCACGGUGCAGAACACAATT  | UUGUUGUUCUGCACCGUGCTT |
| NR5A1-goat-525           | GGCACAGAUUCGAGCCAAUTT | AUUGGCUCGAAUCUGUGCCTT |
| chi-miR-202-5p mimics    | UUCCUAUGCAUAUACUUCUUU | AGAAGUSUGCAUAGGAAUU   |
| chi-miR-202-5p inhibitor | AAAGAAGUAUGCAUAGGAA   |                       |
| mimics NC/siRNA NC       | UUCUCCGAACGUGUCACGUTT | ACGUGACACGUUCGGAGAATT |
| Inhibitor NC             | CAGUACUUUUGUGUAGUACAA |                       |

### Supplementary Figure

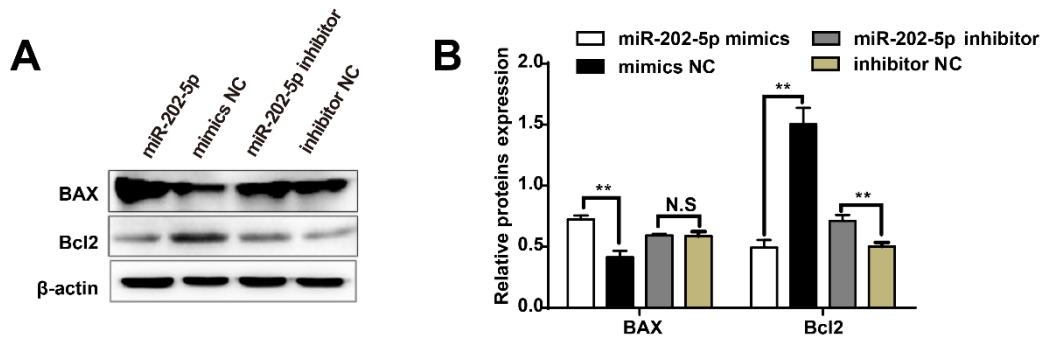

**Figure S1.** miR-202-5p induces GCs apoptosis. GCs were treated with miR-202-5p mimics or miR-202-5p inhibitors and mimics NC or inhibitor NC. Proteins levels of BAX and Bcl2 detected by WB (A); The relative protein levels were calculated (B).
